# Supplementary material for: Health Indifference and the Inverse Association Between Symptom Burden and Healthcare Use: A Longitudinal Cohort Study from the Japan Society and New Tobacco/Infodemic Survey
Source: Research Square preprint supplement (doi:10.21203/rs.3.rs-7584212/v1), 2025-10-22
Supplement: Supplementary file 1 [file 6ba74ab8d53c201e73038915.docx]

Additional file 4. Supplementary Tables

Health Indifference and the Inverse Association Between Symptom Burden and Healthcare Use: A Longitudinal Cohort Study from the Japan Society and New Tobacco/Infodemic Survey

Hikaru Oba¹*, Tomohiro Mitoma², Takahiro Tabuchi³, and Jota Maki¹

¹Medical Development Field, Center for Innovative Clinical Medicine, Okayama University Hospital, Okayama, Okayama, Japan

²Department of Obstetrics and Gynecology, Chugoku Central Hospital, Fukuyama, Hiroshima, Japan

³Division of Epidemiology, School of Public Health, Graduate School of Medicine, Tohoku University, Sendai, Miyagi, Japan

*Corresponding author:

Hikaru Oba, MD., PhD.

Medical Development Field,

Center for Innovative Clinical Medicine,

Okayama University Hospital

2-5-1, Shikata-cho, Kita-Ku, Okayama, Okayama, Japan

Email: [po957sax@okayama-u.ac.jp](mailto:po957sax@okayama-u.ac.jp)

Table S1. Adjusted Risk Ratios for Health Determinants

| Variable | Adjusted RR (95% CI) | P Value | VIF |
| --- | --- | --- | --- |
| Male sex | 1.20 (1.16-1.24) | <.001 | 2.13 |
| Low education (<high school) | 1.16 (1.03-1.30) | .014 | 1.02 |
| Lack of social support | 1.16 (1.12-1.20) | <.001 | 1.45 |
| Current smoking | 1.31 (1.27-1.36) | <.001 | 1.32 |
| No health checkup | 1.21 (1.17-1.25) | <.001 | 1.56 |
| Low household income | 1.04 (0.97-1.12) | .26 | 1.09 |
| Living alone | 1.06 (1.02-1.10) | .002 | 1.26 |
| Heavy drinking | 1.10 (0.95-1.27) | .19 | 1.01 |
| Low physical activity | 1.21 (1.17-1.25) | <.001 | 1.34 |
| Poor self-rated health | 1.03 (0.99-1.08) | .18 | 1.22 |
| Age, y | 0.98 (0.98-0.98) | <.001 | 2.78 |

CI, confidence interval; RR, relative risk; VIF, variance inflation factor.

Table S2. Association Between Health Index and Clinical Outcomesᵃ

| Outcome | No. of Participants | Adjusted RR (95% CI) | P Valuea | E-Value (95% CI) |
| --- | --- | --- | --- | --- |
| Hospitalization | 899 | 0.82 (0.77-0.88) | <.001 | 1.73 (1.53-1.94) |
| COVID-19 vaccination | 13,788 | 1.00 (1.00-1.01) | .22 | 1.07 (1.00-1.12) |
| Influenza vaccination | 6,139 | 0.90 (0.88-0.92) | <.001 | 1.47 (1.40-1.54) |
| COVID-19 infection | 2,632 | 0.97 (0.94-1.01) | .11 | 1.21 (1.00-1.34) |
| Hypertension | 3,935 | 1.04 (1.01-1.07) | .018 | 1.23 (1.08-1.33) |
| Diabetes | 1,242 | 0.96 (0.91-1.02) | .15 | 1.25 (1.00-1.44) |
| Dyslipidemia | 2,618 | 0.98 (0.94-1.02) | .24 | 1.18 (1.00-1.32) |
| Asthma | 525 | 0.93 (0.85-1.02) | .14 | 1.36 (1.00-1.64) |
| Periodontitis | 2,441 | 1.06 (1.02-1.11) | .002 | 1.33 (1.18-1.46) |
| Dental caries | 1,921 | 1.15 (1.10-1.21) | <.001 | 1.58 (1.44-1.71) |
| Angina/MI | 368 | 1.00 (0.90-1.11) | .96 | 1.05 (1.00-1.46) |
| Stroke | 222 | 0.97 (0.87-1.08) | .55 | 1.22 (1.00-1.58) |
| COPD | 184 | 0.99 (0.87-1.11) | .83 | 1.13 (1.00-1.55) |
| CKD | 277 | 0.87 (0.78-0.97) | .010 | 1.56 (1.22-1.87) |
| Chronic liver disease | 203 | 0.94 (0.83-1.06) | .29 | 1.34 (1.00-1.72) |
| Cancer | 391 | 0.81 (0.74-0.89) | <.001 | 1.78 (1.50-2.06) |
| Chronic pain | 2,487 | 0.98 (0.94-1.02) | .42 | 1.15 (1.00-1.31) |
| Depression | 683 | 0.97 (0.90-1.04) | .38 | 1.23 (1.00-1.48) |
| GI discomfort | 3,928 | 1.04 (1.01-1.07) | .011 | 1.23 (1.10-1.33) |
| Back pain | 5,255 | 1.01 (0.99-1.04) | .23 | 1.14 (1.00-1.24) |
| Joint pain | 4,284 | 1.02 (0.99-1.05) | .12 | 1.16 (1.00-1.26) |
| Headache | 3,067 | 1.05 (1.02-1.09) | .003 | 1.27 (1.17-1.37) |
| Chest pain | 1,352 | 1.10 (1.05-1.16) | <.001 | 1.44 (1.29-1.60) |
| Dyspnea | 1,785 | 1.08 (1.03-1.13) | <.001 | 1.38 (1.23-1.53) |
| Dizziness | 1,781 | 1.02 (0.98-1.07) | .35 | 1.17 (1.00-1.35) |
| Sleep disturbance | 3,959 | 1.00 (0.98-1.03) | .76 | 1.06 (1.00-1.21) |
| Memory disorder | 1,592 | 1.09 (1.04-1.14) | <.001 | 1.41 (1.25-1.57) |
| Concentration decline | 2,374 | 1.07 (1.03-1.11) | <.001 | 1.35 (1.21-1.48) |
| Reduced libido | 2,202 | 1.00 (0.96-1.04) | .82 | 1.07 (1.00-1.24) |
| Fatigue | 3,088 | 1.04 (1.01-1.07) | .021 | 1.23 (1.10-1.33) |
| Cough | 1,658 | 1.05 (1.00-1.10) | .068 | 1.26 (1.00-1.42) |
| Fever | 728 | 1.12 (1.05-1.19) | <.001 | 1.50 (1.29-1.69) |

CI, confidence interval; CKD, chronic kidney disease; COPD, chronic obstructive pulmonary disease; FDR, false discovery rate; GI, gastrointestinal; MI, myocardial infarction; RR, relative risk. ᵃFDR-adjusted P values using Benjamini-Hochberg method.

Table S3. Sensitivity Analysis of Primary Outcomesᵃ

| Outcome | No. of Events | RR (95% CI) | P Value | E-Value Point (95% CI) | Absolute Risk, % |
| --- | --- | --- | --- | --- | --- |
| Hospitalization past year | 659 | 0.83 (0.77-0.90) | <.001 | 1.70 (1.47-1.96) | 5.79 |
| COVID-19 vaccination | 9,825 | 1.01 (1.00-1.02) | .076 | 1.09 (1.00-1.20) | 89.69 |
| Influenza vaccination | 4,405 | 0.90 (0.88-0.93) | <.001 | 1.45 (1.37-1.54) | 39.08 |
| COVID-19 infection | 1,890 | 0.98 (0.93-1.03) | .36 | 1.19 (1.00-1.29) | 17.05 |
| Hypertension | 3,008 | 1.03 (1.00-1.07) | .093 | 1.21 (1.00-1.33) | 27.12 |
| Diabetes | 912 | 0.92 (0.86-0.99) | .019 | 1.39 (1.09-1.61) | 8.02 |
| Dyslipidemia | 1,896 | 0.99 (0.94-1.03) | .57 | 1.14 (1.00-1.29) | 16.87 |
| Asthma | 365 | 0.87 (0.78-0.97) | .015 | 1.55 (1.21-1.88) | 3.26 |
| Periodontitis | 1,788 | 1.07 (1.02-1.13) | .006 | 1.35 (1.18-1.52) | 16.27 |
| Dental caries | 1,395 | 1.17 (1.10-1.24) | <.001 | 1.63 (1.44-1.81) | 12.66 |
| Angina/MI | 260 | 1.02 (0.90-1.17) | .74 | 1.19 (1.00-1.63) | 2.31 |
| Stroke | 154 | 0.98 (0.82-1.16) | .78 | 1.19 (1.00-1.70) | 1.38 |
| COPD | 132 | 0.95 (0.79-1.15) | .62 | 1.27 (1.00-1.82) | 1.18 |
| CKD | 189 | 0.89 (0.76-1.04) | .14 | 1.52 (1.00-2.00) | 1.68 |
| Chronic liver disease | 131 | 0.96 (0.80-1.15) | .65 | 1.26 (1.00-1.81) | 1.19 |
| Cancer | 284 | 0.82 (0.73-0.94) | .004 | 1.71 (1.33-2.10) | 2.55 |
| Chronic pain | 1,753 | 0.97 (0.92-1.02) | .20 | 1.22 (1.00-1.40) | 15.75 |
| Depression | 463 | 0.96 (0.86-1.06) | .40 | 1.27 (1.00-1.60) | 4.17 |
| GI discomfort | 2,685 | 1.03 (0.99-1.07) | .14 | 1.21 (1.00-1.34) | 24.45 |
| Back pain | 3,661 | 1.00 (0.97-1.03) | .93 | 1.09 (1.00-1.22) | 33.43 |
| Joint pain | 2,966 | 1.01 (0.98-1.05) | .46 | 1.15 (1.00-1.27) | 26.97 |
| Headache | 1,986 | 1.06 (1.01-1.11) | .013 | 1.31 (1.12-1.47) | 18.12 |
| Chest pain | 921 | 1.07 (0.99-1.15) | .088 | 1.34 (1.00-1.58) | 8.31 |
| Dyspnea | 1,195 | 1.06 (0.99-1.13) | .086 | 1.30 (1.00-1.52) | 10.81 |
| Dizziness | 1,130 | 1.01 (0.94-1.08) | .83 | 1.13 (1.00-1.39) | 10.15 |
| Sleep disturbance | 2,706 | 1.00 (0.97-1.04) | .85 | 1.10 (1.00-1.25) | 24.70 |
| Memory disorder | 1,107 | 1.07 (1.00-1.15) | .042 | 1.35 (1.01-1.58) | 10.09 |
| Concentration decline | 1,623 | 1.04 (0.99-1.10) | .14 | 1.25 (1.00-1.43) | 14.75 |
| Reduced libido | 1,661 | 1.00 (0.94-1.05) | .91 | 1.08 (1.00-1.28) | 15.19 |
| Fatigue | 2,126 | 1.03 (0.98-1.07) | .28 | 1.20 (1.00-1.34) | 19.37 |
| Cough | 1,153 | 1.04 (0.98-1.11) | .21 | 1.25 (1.00-1.47) | 10.47 |
| Fever | 489 | 1.10 (1.01-1.21) | .039 | 1.44 (1.12-1.74) | 4.41 |

Number of Complete cases were 10,876; Percentage of completeness was 70.1%. CI, confidence interval; CKD, chronic kidney disease; COPD, chronic obstructive pulmonary disease; GI, gastrointestinal; MI, myocardial infarction; RR, relative risk. ᵃAnalysis limited to participants with complete data for each outcome.

Table S4. Outcomes by Health Index Quartile

| Quartile | No. of Participants | No. of Events | Adjusted Absolute Risk, % (95% CI) | Adjusted RR vs Q1 (95% CI) | P Value |
| --- | --- | --- | --- | --- | --- |
| Q1 (lowest) | 4,365 | 315 | 6.87 (6.13-7.62) | 1.00 (reference) | - |
| Q2 | 4,095 | 268 | 6.22 (5.50-6.96) | 1.14 (0.99-1.32) | .065 |
| Q3 | 3,518 | 183 | 5.06 (4.33-5.79) | 0.96 (0.82-1.13) | .63 |
| Q4 (highest) | 3,541 | 133 | 3.68 (3.05-4.30) | 0.64 (0.53-0.78) | <.001 |

CI, confidence interval; NA, not applicable; Q, quartile; RR, relative risk. ᵃP for trend <.001.

Table S5. Path Coefficients From Causal Discovery Analysis

| Path | Method | Subset | No. of Folds | Average Coefficient |
| --- | --- | --- | --- | --- |
| Age → Lack of social support | DirectLiNGAM | Disease | 10 | 1.00 |
| Male sex → Current smoking | DirectLiNGAM | Disease | 10 | 1.00 |
| Male sex → No health checkup | DirectLiNGAM | Disease | 10 | 1.00 |
| Male sex → Low income | DirectLiNGAM | Disease | 10 | 1.00 |
| Lack of social support → Low income | DirectLiNGAM | Disease | 6 | 1.00 |
| No health checkup → Low income | DirectLiNGAM | Disease | 10 | 1.00 |
| Living alone → Low income | DirectLiNGAM | Disease | 10 | 1.00 |
| Age → Low income | DirectLiNGAM | Disease | 10 | 1.00 |
| Age → Living alone | DirectLiNGAM | Disease | 10 | 1.00 |
| Lack of social support → Poor self-rated health | DirectLiNGAM | Disease | 10 | 1.00 |
| Low physical activity → Poor self-rated health | DirectLiNGAM | Disease | 10 | 1.00 |
| BMI → Poor self-rated health | DirectLiNGAM | Disease | 9 | 1.00 |
| Male sex → Heavy drinking | DirectLiNGAM | Disease | 10 | 1.00 |
| Current smoking → Heavy drinking | DirectLiNGAM | Disease | 10 | 1.00 |
| Age → Heavy drinking | DirectLiNGAM | Disease | 9 | 1.00 |
| Male sex → Low physical activity | DirectLiNGAM | Disease | 6 | 1.00 |
| Lack of social support → HI sum 22 | DirectLiNGAM | Disease | 10 | 1.00 |
| Current smoking → HI sum 22 | DirectLiNGAM | Disease | 10 | 1.00 |
| Age → HI sum 22 | DirectLiNGAM | Disease | 10 | 1.00 |
| BMI → HI sum 22 | DirectLiNGAM | Disease | 10 | 1.00 |
| HI sum 22 → Hospitalization past year 23 | DirectLiNGAM | Disease | 10 | 1.00 |
| Hypertension 23 → Hospitalization past year 23 | DirectLiNGAM | Disease | 10 | 1.00 |
| Diabetes 23 → Hospitalization past year 23 | DirectLiNGAM | Disease | 9 | 1.00 |
| Age → COVID-19 infection 23 | DirectLiNGAM | Disease | 10 | 1.00 |
| HI sum 22 → COVID-19 infection 23 | DirectLiNGAM | Disease | 10 | 1.00 |
| Hypertension 23 → COVID-19 infection 23 | DirectLiNGAM | Disease | 8 | 1.00 |
| No health checkup → COVID-19 vaccination 23 | DirectLiNGAM | Disease | 10 | 1.00 |
| Age → COVID-19 vaccination 23 | DirectLiNGAM | Disease | 10 | 1.00 |
| Influenza vaccination 23 → COVID-19 vaccination 23 | DirectLiNGAM | Disease | 10 | 1.00 |
| Hypertension 23 → COVID-19 vaccination 23 | DirectLiNGAM | Disease | 10 | 1.00 |
| Dyslipidemia 23 → COVID-19 vaccination 23 | DirectLiNGAM | Disease | 10 | 1.00 |
| No health checkup → Influenza vaccination 23 | DirectLiNGAM | Disease | 10 | 1.00 |
| Age → Influenza vaccination 23 | DirectLiNGAM | Disease | 10 | 1.00 |
| HI sum 22 → Influenza vaccination 23 | DirectLiNGAM | Disease | 10 | 1.00 |
| Hypertension 23 → Influenza vaccination 23 | DirectLiNGAM | Disease | 10 | 1.00 |
| Male sex → Hypertension 23 | DirectLiNGAM | Disease | 10 | 1.00 |
| Age → Hypertension 23 | DirectLiNGAM | Disease | 10 | 1.00 |
| Heavy drinking → Hypertension 23 | DirectLiNGAM | Disease | 10 | 1.00 |
| BMI → Hypertension 23 | DirectLiNGAM | Disease | 10 | 1.00 |
| HI sum 22 → Hypertension 23 | DirectLiNGAM | Disease | 10 | 1.00 |
| Male sex → Diabetes 23 | DirectLiNGAM | Disease | 10 | 1.00 |
| Age → Diabetes 23 | DirectLiNGAM | Disease | 10 | 1.00 |
| Poor self-rated health → Diabetes 23 | DirectLiNGAM | Disease | 10 | 1.00 |
| BMI → Diabetes 23 | DirectLiNGAM | Disease | 10 | 1.00 |
| Hypertension 23 → Diabetes 23 | DirectLiNGAM | Disease | 10 | 1.00 |
| Dyslipidemia 23 → Diabetes 23 | DirectLiNGAM | Disease | 10 | 1.00 |
| No health checkup → Dyslipidemia 23 | DirectLiNGAM | Disease | 10 | 1.00 |
| Age → Dyslipidemia 23 | DirectLiNGAM | Disease | 10 | 1.00 |
| BMI → Dyslipidemia 23 | DirectLiNGAM | Disease | 10 | 1.00 |
| HI sum 22 → Dyslipidemia 23 | DirectLiNGAM | Disease | 10 | 1.00 |
| Influenza vaccination 23 → Dyslipidemia 23 | DirectLiNGAM | Disease | 10 | 1.00 |
| Hypertension 23 → Dyslipidemia 23 | DirectLiNGAM | Disease | 10 | 1.00 |
| Periodontitis 23 → Dyslipidemia 23 | DirectLiNGAM | Disease | 10 | 1.00 |
| Chronic pain 23 → Dyslipidemia 23 | DirectLiNGAM | Disease | 10 | 1.00 |
| Age → Asthma 23 | DirectLiNGAM | Disease | 10 | 1.00 |
| COVID-19 infection 23 → Asthma 23 | DirectLiNGAM | Disease | 10 | 1.00 |
| Diabetes 23 → Asthma 23 | DirectLiNGAM | Disease | 9 | 1.00 |
| Chronic pain 23 → Asthma 23 | DirectLiNGAM | Disease | 10 | 1.00 |
| Depression 23 → Asthma 23 | DirectLiNGAM | Disease | 10 | 1.00 |
| Age → Periodontitis 23 | DirectLiNGAM | Disease | 10 | 1.00 |
| Hypertension 23 → Periodontitis 23 | DirectLiNGAM | Disease | 10 | 1.00 |
| Chronic pain 23 → Periodontitis 23 | DirectLiNGAM | Disease | 10 | 1.00 |
| HI sum 22 → Dental caries 23 | DirectLiNGAM | Disease | 10 | 1.00 |
| Periodontitis 23 → Dental caries 23 | DirectLiNGAM | Disease | 10 | 1.00 |
| Chronic pain 23 → Dental caries 23 | DirectLiNGAM | Disease | 10 | 1.00 |
| Male sex → Angina/MI 23 | DirectLiNGAM | Disease | 9 | 1.00 |
| Hospitalization past year 23 → Angina/MI 23 | DirectLiNGAM | Disease | 10 | 1.00 |
| Hypertension 23 → Angina/MI 23 | DirectLiNGAM | Disease | 10 | 1.00 |
| Diabetes 23 → Angina/MI 23 | DirectLiNGAM | Disease | 10 | 1.00 |
| Dyslipidemia 23 → Angina/MI 23 | DirectLiNGAM | Disease | 10 | 1.00 |
| Periodontitis 23 → Angina/MI 23 | DirectLiNGAM | Disease | 10 | 1.00 |
| Dental caries 23 → Angina/MI 23 | DirectLiNGAM | Disease | 10 | 1.00 |
| Depression 23 → Angina/MI 23 | DirectLiNGAM | Disease | 9 | 1.00 |
| COVID-19 infection 23 → Stroke 23 | DirectLiNGAM | Disease | 10 | 1.00 |
| Hypertension 23 → Stroke 23 | DirectLiNGAM | Disease | 10 | 1.00 |
| Diabetes 23 → Stroke 23 | DirectLiNGAM | Disease | 10 | 1.00 |
| Asthma 23 → Stroke 23 | DirectLiNGAM | Disease | 10 | 1.00 |
| Dental caries 23 → Stroke 23 | DirectLiNGAM | Disease | 10 | 1.00 |
| Angina/MI 23 → Stroke 23 | DirectLiNGAM | Disease | 10 | 1.00 |
| CKD 23 → Stroke 23 | DirectLiNGAM | Disease | 10 | 1.00 |
| Cancer 23 → Stroke 23 | DirectLiNGAM | Disease | 10 | 1.00 |
| Depression 23 → Stroke 23 | DirectLiNGAM | Disease | 10 | 1.00 |
| Current smoking → COPD 23 | DirectLiNGAM | Disease | 10 | 1.00 |
| Poor self-rated health → COPD 23 | DirectLiNGAM | Disease | 10 | 1.00 |
| BMI → COPD 23 | DirectLiNGAM | Disease | 7 | 1.00 |
| COVID-19 infection 23 → COPD 23 | DirectLiNGAM | Disease | 10 | 1.00 |
| Diabetes 23 → COPD 23 | DirectLiNGAM | Disease | 10 | 1.00 |
| Asthma 23 → COPD 23 | DirectLiNGAM | Disease | 10 | 1.00 |
| Dental caries 23 → COPD 23 | DirectLiNGAM | Disease | 10 | 1.00 |
| Angina/MI 23 → COPD 23 | DirectLiNGAM | Disease | 10 | 1.00 |
| Stroke 23 → COPD 23 | DirectLiNGAM | Disease | 10 | 1.00 |
| CKD 23 → COPD 23 | DirectLiNGAM | Disease | 10 | 1.00 |
| Cancer 23 → COPD 23 | DirectLiNGAM | Disease | 10 | 1.00 |
| Depression 23 → COPD 23 | DirectLiNGAM | Disease | 10 | 1.00 |
| No health checkup → CKD 23 | DirectLiNGAM | Disease | 10 | 1.00 |
| Age → CKD 23 | DirectLiNGAM | Disease | 8 | 1.00 |
| Hypertension 23 → CKD 23 | DirectLiNGAM | Disease | 10 | 1.00 |
| Diabetes 23 → CKD 23 | DirectLiNGAM | Disease | 10 | 1.00 |
| Dyslipidemia 23 → CKD 23 | DirectLiNGAM | Disease | 10 | 1.00 |
| Asthma 23 → CKD 23 | DirectLiNGAM | Disease | 10 | 1.00 |
| Angina/MI 23 → CKD 23 | DirectLiNGAM | Disease | 10 | 1.00 |
| Cancer 23 → CKD 23 | DirectLiNGAM | Disease | 10 | 1.00 |
| Depression 23 → CKD 23 | DirectLiNGAM | Disease | 10 | 1.00 |
| Age → Chronic liver disease 23 | DirectLiNGAM | Disease | 10 | 1.00 |
| COVID-19 infection 23 → Chronic liver disease 23 | DirectLiNGAM | Disease | 10 | 1.00 |
| Diabetes 23 → Chronic liver disease 23 | DirectLiNGAM | Disease | 10 | 1.00 |
| Dyslipidemia 23 → Chronic liver disease 23 | DirectLiNGAM | Disease | 10 | 1.00 |
| Asthma 23 → Chronic liver disease 23 | DirectLiNGAM | Disease | 10 | 1.00 |
| Periodontitis 23 → Chronic liver disease 23 | DirectLiNGAM | Disease | 6 | 1.00 |
| Dental caries 23 → Chronic liver disease 23 | DirectLiNGAM | Disease | 10 | 1.00 |
| Angina/MI 23 → Chronic liver disease 23 | DirectLiNGAM | Disease | 10 | 1.00 |
| Stroke 23 → Chronic liver disease 23 | DirectLiNGAM | Disease | 10 | 1.00 |
| CKD 23 → Chronic liver disease 23 | DirectLiNGAM | Disease | 10 | 1.00 |
| Cancer 23 → Chronic liver disease 23 | DirectLiNGAM | Disease | 10 | 1.00 |
| Depression 23 → Chronic liver disease 23 | DirectLiNGAM | Disease | 10 | 1.00 |
| HI sum 22 → Cancer 23 | DirectLiNGAM | Disease | 10 | 1.00 |
| Hospitalization past year 23 → Cancer 23 | DirectLiNGAM | Disease | 10 | 1.00 |
| Angina/MI 23 → Cancer 23 | DirectLiNGAM | Disease | 6 | 1.00 |
| Chronic pain 23 → Cancer 23 | DirectLiNGAM | Disease | 10 | 1.00 |
| Depression 23 → Cancer 23 | DirectLiNGAM | Disease | 10 | 1.00 |
| Age → Chronic pain 23 | DirectLiNGAM | Disease | 6 | 1.00 |
| Poor self-rated health → Chronic pain 23 | DirectLiNGAM | Disease | 10 | 1.00 |
| BMI → Chronic pain 23 | DirectLiNGAM | Disease | 8 | 1.00 |
| Lack of social support → Depression 23 | DirectLiNGAM | Disease | 10 | 1.00 |
| Low income → Depression 23 | DirectLiNGAM | Disease | 9 | 1.00 |
| Age → Depression 23 | DirectLiNGAM | Disease | 10 | 1.00 |
| Poor self-rated health → Depression 23 | DirectLiNGAM | Disease | 10 | 1.00 |
| HI sum 22 → Depression 23 | DirectLiNGAM | Disease | 10 | 1.00 |
| Dyslipidemia 23 → Depression 23 | DirectLiNGAM | Disease | 10 | 1.00 |
| Dental caries 23 → Depression 23 | DirectLiNGAM | Disease | 10 | 1.00 |
| Chronic pain 23 → Depression 23 | DirectLiNGAM | Disease | 10 | 1.00 |
| HI sum 22 → Diabetes 23 | DirectLiNGAM | Disease | 6 | 1.00 |
| Chronic pain 23 → Angina/MI 23 | DirectLiNGAM | Disease | 9 | 1.00 |
| Dyslipidemia 23 → COPD 23 | DirectLiNGAM | Disease | 7 | 1.00 |
| Chronic pain 23 → COPD 23 | DirectLiNGAM | Disease | 7 | 1.00 |
| Current smoking → CKD 23 | DirectLiNGAM | Disease | 6 | 1.00 |
| BMI → CKD 23 | DirectLiNGAM | Disease | 8 | 1.00 |
| Current smoking → Depression 23 | DirectLiNGAM | Disease | 7 | 1.00 |
| BMI → Depression 23 | DirectLiNGAM | Disease | 6 | 1.00 |
| Periodontitis 23 → COPD 23 | DirectLiNGAM | Disease | 7 | 1.00 |
| Living alone → Low income | GOLEM | Disease | 10 | 1.00 |
| Lack of social support → Poor self-rated health | GOLEM | Disease | 6 | 1.00 |
| Male sex → Heavy drinking | GOLEM | Disease | 7 | 1.00 |
| Current smoking → Heavy drinking | GOLEM | Disease | 6 | 1.00 |
| Diabetes 23 → Hospitalization past year 23 | GOLEM | Disease | 9 | 1.00 |
| COVID-19 vaccination 23 → Influenza vaccination 23 | GOLEM | Disease | 7 | 1.00 |
| Low education → Diabetes 23 | GOLEM | Disease | 9 | 1.00 |
| Poor self-rated health → Diabetes 23 | GOLEM | Disease | 6 | 1.00 |
| COVID-19 infection 23 → Asthma 23 | GOLEM | Disease | 7 | 1.00 |
| Depression 23 → Asthma 23 | GOLEM | Disease | 7 | 1.00 |
| Periodontitis 23 → Dental caries 23 | GOLEM | Disease | 9 | 1.00 |
| COVID-19 infection 23 → Angina/MI 23 | GOLEM | Disease | 6 | 1.00 |
| Cancer 23 → Angina/MI 23 | GOLEM | Disease | 9 | 1.00 |
| Asthma 23 → Stroke 23 | GOLEM | Disease | 9 | 1.00 |
| Dental caries 23 → Stroke 23 | GOLEM | Disease | 6 | 1.00 |
| Angina/MI 23 → Stroke 23 | GOLEM | Disease | 10 | 1.00 |
| Cancer 23 → Stroke 23 | GOLEM | Disease | 9 | 1.00 |
| Hospitalization past year 23 → COPD 23 | GOLEM | Disease | 10 | 1.00 |
| Diabetes 23 → COPD 23 | GOLEM | Disease | 7 | 1.00 |
| Dyslipidemia 23 → COPD 23 | GOLEM | Disease | 9 | 1.00 |
| Dental caries 23 → COPD 23 | GOLEM | Disease | 9 | 1.00 |
| CKD 23 → COPD 23 | GOLEM | Disease | 7 | 1.00 |
| Chronic pain 23 → COPD 23 | GOLEM | Disease | 8 | 1.00 |
| Hypertension 23 → CKD 23 | GOLEM | Disease | 7 | 1.00 |
| Angina/MI 23 → CKD 23 | GOLEM | Disease | 6 | 1.00 |
| Stroke 23 → CKD 23 | GOLEM | Disease | 9 | 1.00 |
| Low education → Chronic liver disease 23 | GOLEM | Disease | 8 | 1.00 |
| Poor self-rated health → Chronic liver disease 23 | GOLEM | Disease | 8 | 1.00 |
| Hospitalization past year 23 → Chronic liver disease 23 | GOLEM | Disease | 9 | 1.00 |
| Hypertension 23 → Chronic liver disease 23 | GOLEM | Disease | 7 | 1.00 |
| Diabetes 23 → Chronic liver disease 23 | GOLEM | Disease | 10 | 1.00 |
| Periodontitis 23 → Chronic liver disease 23 | GOLEM | Disease | 9 | 1.00 |
| Dental caries 23 → Chronic liver disease 23 | GOLEM | Disease | 9 | 1.00 |
| Chronic pain 23 → Chronic liver disease 23 | GOLEM | Disease | 10 | 1.00 |
| Hospitalization past year 23 → Cancer 23 | GOLEM | Disease | 9 | 1.00 |
| Asthma 23 → Cancer 23 | GOLEM | Disease | 7 | 1.00 |
| Depression 23 → Cancer 23 | GOLEM | Disease | 8 | 1.00 |
| Age → Depression 23 | GOLEM | Disease | 7 | 1.00 |
| Poor self-rated health → Depression 23 | GOLEM | Disease | 8 | 1.00 |
| Dental caries 23 → Depression 23 | GOLEM | Disease | 6 | 1.00 |
| Chronic liver disease 23 → Depression 23 | GOLEM | Disease | 6 | 1.00 |
| Hospitalization past year 23 → Stroke 23 | GOLEM | Disease | 8 | 1.00 |
| Diabetes 23 → Stroke 23 | GOLEM | Disease | 6 | 1.00 |
| Periodontitis 23 → COPD 23 | GOLEM | Disease | 6 | 1.00 |
| Hospitalization past year 23 → CKD 23 | GOLEM | Disease | 6 | 1.00 |
| Dyslipidemia 23 → CKD 23 | GOLEM | Disease | 6 | 1.00 |
| Lack of social support → Depression 23 | GOLEM | Disease | 7 | 1.00 |
| Chronic pain 23 → CKD 23 | GOLEM | Disease | 6 | 1.00 |
| Living alone → Low income | CORL | Disease | 6 | 1.00 |
| Age → COVID-19 infection 23 | CORL | Disease | 10 | 1.00 |
| Age → Hypertension 23 | CORL | Disease | 10 | 1.00 |
| BMI → Hypertension 23 | CORL | Disease | 10 | 1.00 |
| Influenza vaccination 23 → COVID-19 vaccination 23 | CORL | Disease | 7 | 1.00 |
| Low income → Lack of social support | DAGMA | Disease | 10 | 0.16 |
| Poor self-rated health → Lack of social support | DAGMA | Disease | 8 | 0.58 |
| Heavy drinking → Current smoking | DAGMA | Disease | 6 | 0.36 |
| Low education → No health checkup | DAGMA | Disease | 10 | 0.18 |
| Low income → No health checkup | DAGMA | Disease | 10 | 0.39 |
| Poor self-rated health → No health checkup | DAGMA | Disease | 9 | 0.14 |
| Low income → Living alone | DAGMA | Disease | 8 | 0.98 |
| Low income → Low physical activity | DAGMA | Disease | 10 | 0.23 |
| Poor self-rated health → Low physical activity | DAGMA | Disease | 8 | 0.33 |
| Low education → BMI | DAGMA | Disease | 10 | 0.50 |
| Lack of social support → BMI | DAGMA | Disease | 7 | 0.37 |
| Current smoking → BMI | DAGMA | Disease | 9 | 0.72 |
| Low income → BMI | DAGMA | Disease | 7 | 0.28 |
| Living alone → BMI | DAGMA | Disease | 10 | 0.31 |
| Age → BMI | DAGMA | Disease | 6 | 2.07 |
| Poor self-rated health → BMI | DAGMA | Disease | 9 | 1.13 |
| Heavy drinking → BMI | DAGMA | Disease | 9 | 0.31 |
| Low physical activity → BMI | DAGMA | Disease | 10 | 0.33 |
| Male sex → HI sum 22 | DAGMA | Disease | 8 | 0.39 |
| Low education → HI sum 22 | DAGMA | Disease | 10 | 0.23 |
| Current smoking → HI sum 22 | DAGMA | Disease | 8 | 0.58 |
| No health checkup → HI sum 22 | DAGMA | Disease | 9 | 0.29 |
| Low income → HI sum 22 | DAGMA | Disease | 9 | 0.24 |
| Living alone → HI sum 22 | DAGMA | Disease | 10 | 0.48 |
| Poor self-rated health → HI sum 22 | DAGMA | Disease | 10 | 0.23 |
| Heavy drinking → HI sum 22 | DAGMA | Disease | 9 | 0.29 |
| Low physical activity → HI sum 22 | DAGMA | Disease | 10 | 0.33 |
| Asthma 23 → COVID-19 infection 23 | DAGMA | Disease | 9 | 0.22 |
| Angina/MI 23 → COVID-19 infection 23 | DAGMA | Disease | 8 | 0.15 |
| Stroke 23 → COVID-19 infection 23 | DAGMA | Disease | 10 | 0.23 |
| COPD 23 → COVID-19 infection 23 | DAGMA | Disease | 9 | 0.23 |
| Chronic liver disease 23 → COVID-19 infection 23 | DAGMA | Disease | 10 | 0.29 |
| Low education → COVID-19 vaccination 23 | DAGMA | Disease | 7 | 0.11 |
| No health checkup → COVID-19 vaccination 23 | DAGMA | Disease | 6 | 0.20 |
| Age → COVID-19 vaccination 23 | DAGMA | Disease | 6 | 0.12 |
| Poor self-rated health → COVID-19 vaccination 23 | DAGMA | Disease | 9 | 0.15 |
| Influenza vaccination 23 → COVID-19 vaccination 23 | DAGMA | Disease | 7 | 0.40 |
| Current smoking → Influenza vaccination 23 | DAGMA | Disease | 9 | 0.19 |
| Low income → Influenza vaccination 23 | DAGMA | Disease | 10 | 0.19 |
| Age → Influenza vaccination 23 | DAGMA | Disease | 6 | 1.37 |
| Hypertension 23 → Influenza vaccination 23 | DAGMA | Disease | 9 | 0.21 |
| Dyslipidemia 23 → Influenza vaccination 23 | DAGMA | Disease | 9 | 0.23 |
| Asthma 23 → Influenza vaccination 23 | DAGMA | Disease | 10 | 0.19 |
| Heavy drinking → Hypertension 23 | DAGMA | Disease | 10 | 0.32 |
| Hospitalization past year 23 → Hypertension 23 | DAGMA | Disease | 9 | 0.22 |
| Diabetes 23 → Hypertension 23 | DAGMA | Disease | 9 | 0.68 |
| Asthma 23 → Hypertension 23 | DAGMA | Disease | 9 | 0.17 |
| Periodontitis 23 → Hypertension 23 | DAGMA | Disease | 6 | 0.18 |
| Angina/MI 23 → Hypertension 23 | DAGMA | Disease | 10 | 0.51 |
| Stroke 23 → Hypertension 23 | DAGMA | Disease | 10 | 0.45 |
| COPD 23 → Hypertension 23 | DAGMA | Disease | 9 | 0.18 |
| CKD 23 → Hypertension 23 | DAGMA | Disease | 10 | 0.43 |
| Cancer 23 → Hypertension 23 | DAGMA | Disease | 7 | 0.19 |
| Chronic pain 23 → Hypertension 23 | DAGMA | Disease | 7 | 0.14 |
| Hospitalization past year 23 → Diabetes 23 | DAGMA | Disease | 7 | 0.17 |
| CKD 23 → Diabetes 23 | DAGMA | Disease | 6 | 0.39 |
| Diabetes 23 → Dyslipidemia 23 | DAGMA | Disease | 7 | 0.44 |
| Angina/MI 23 → Dyslipidemia 23 | DAGMA | Disease | 9 | 0.34 |
| COPD 23 → Dyslipidemia 23 | DAGMA | Disease | 9 | 0.25 |
| CKD 23 → Dyslipidemia 23 | DAGMA | Disease | 9 | 0.24 |
| Chronic liver disease 23 → Dyslipidemia 23 | DAGMA | Disease | 9 | 0.47 |
| Chronic pain 23 → Dyslipidemia 23 | DAGMA | Disease | 6 | 0.13 |
| Depression 23 → Dyslipidemia 23 | DAGMA | Disease | 8 | 0.17 |
| Stroke 23 → Asthma 23 | DAGMA | Disease | 6 | 0.35 |
| COPD 23 → Asthma 23 | DAGMA | Disease | 8 | 0.51 |
| CKD 23 → Asthma 23 | DAGMA | Disease | 8 | 0.26 |
| Chronic liver disease 23 → Asthma 23 | DAGMA | Disease | 8 | 0.20 |
| Dental caries 23 → Periodontitis 23 | DAGMA | Disease | 6 | 0.78 |
| Angina/MI 23 → Periodontitis 23 | DAGMA | Disease | 9 | 0.24 |
| COPD 23 → Periodontitis 23 | DAGMA | Disease | 9 | 0.25 |
| Chronic liver disease 23 → Periodontitis 23 | DAGMA | Disease | 9 | 0.28 |
| Chronic pain 23 → Periodontitis 23 | DAGMA | Disease | 7 | 0.16 |
| Angina/MI 23 → Dental caries 23 | DAGMA | Disease | 6 | 0.18 |
| Stroke 23 → Dental caries 23 | DAGMA | Disease | 8 | 0.26 |
| COPD 23 → Dental caries 23 | DAGMA | Disease | 8 | 0.27 |
| Chronic liver disease 23 → Dental caries 23 | DAGMA | Disease | 7 | 0.24 |
| Chronic pain 23 → Dental caries 23 | DAGMA | Disease | 6 | 0.16 |
| Depression 23 → Dental caries 23 | DAGMA | Disease | 8 | 0.25 |
| Hospitalization past year 23 → Angina/MI 23 | DAGMA | Disease | 7 | 0.14 |
| COPD 23 → Angina/MI 23 | DAGMA | Disease | 6 | 0.47 |
| Cancer 23 → Angina/MI 23 | DAGMA | Disease | 6 | 0.18 |
| CKD 23 → Stroke 23 | DAGMA | Disease | 6 | 0.42 |
| Cancer 23 → Stroke 23 | DAGMA | Disease | 6 | 0.20 |
| CKD 23 → COPD 23 | DAGMA | Disease | 6 | 0.32 |
| Angina/MI 23 → Chronic pain 23 | DAGMA | Disease | 8 | 0.24 |
| COPD 23 → Chronic pain 23 | DAGMA | Disease | 7 | 0.30 |
| Chronic liver disease 23 → Chronic pain 23 | DAGMA | Disease | 6 | 0.23 |
| Cancer 23 → Chronic pain 23 | DAGMA | Disease | 8 | 0.32 |
| Depression 23 → Chronic pain 23 | DAGMA | Disease | 7 | 0.29 |
| Low physical activity → No health checkup | DAGMA | Disease | 8 | 0.15 |
| Low education → Low physical activity | DAGMA | Disease | 9 | 0.13 |
| Lack of social support → HI sum 22 | DAGMA | Disease | 8 | 0.31 |
| Living alone → Influenza vaccination 23 | DAGMA | Disease | 7 | 0.12 |
| Hospitalization past year 23 → Influenza vaccination 23 | DAGMA | Disease | 6 | 0.14 |
| Stroke 23 → Influenza vaccination 23 | DAGMA | Disease | 6 | 0.12 |
| Angina/MI 23 → Diabetes 23 | DAGMA | Disease | 7 | 0.32 |
| COPD 23 → Diabetes 23 | DAGMA | Disease | 7 | 0.35 |
| Chronic liver disease 23 → Diabetes 23 | DAGMA | Disease | 7 | 0.35 |
| Angina/MI 23 → Asthma 23 | DAGMA | Disease | 6 | 0.13 |
| Stroke 23 → COPD 23 | DAGMA | Disease | 6 | 0.43 |
| Cancer 23 → COPD 23 | DAGMA | Disease | 6 | 0.34 |
| Angina/MI 23 → CKD 23 | DAGMA | Disease | 6 | 0.25 |
| Chronic liver disease 23 → CKD 23 | DAGMA | Disease | 6 | 0.50 |
| Cancer 23 → CKD 23 | DAGMA | Disease | 6 | 0.24 |
| Angina/MI 23 → Chronic liver disease 23 | DAGMA | Disease | 6 | 0.23 |
| Stroke 23 → Chronic liver disease 23 | DAGMA | Disease | 7 | 0.40 |
| Cancer 23 → Chronic liver disease 23 | DAGMA | Disease | 7 | 0.26 |
| Age → HI sum 22 | DAGMA | Disease | 6 | 1.76 |
| Dyslipidemia 23 → Hypertension 23 | DAGMA | Disease | 7 | 0.46 |
| Low physical activity → Influenza vaccination 23 | DAGMA | Disease | 6 | 0.11 |
| Cancer 23 → Diabetes 23 | DAGMA | Disease | 6 | 0.19 |
| Asthma 23 → Diabetes 23 | DAGMA | Disease | 6 | 0.15 |
| Age → Lack of social support | DirectLiNGAM | Symptoms | 10 | 1.00 |
| Male sex → Current smoking | DirectLiNGAM | Symptoms | 10 | 1.00 |
| Male sex → No health checkup | DirectLiNGAM | Symptoms | 10 | 1.00 |
| Male sex → Low income | DirectLiNGAM | Symptoms | 9 | 1.00 |
| No health checkup → Low income | DirectLiNGAM | Symptoms | 10 | 1.00 |
| Living alone → Low income | DirectLiNGAM | Symptoms | 10 | 1.00 |
| Age → Low income | DirectLiNGAM | Symptoms | 10 | 1.00 |
| Age → Living alone | DirectLiNGAM | Symptoms | 10 | 1.00 |
| Lack of social support → Poor self-rated health | DirectLiNGAM | Symptoms | 10 | 1.00 |
| Age → Poor self-rated health | DirectLiNGAM | Symptoms | 7 | 1.00 |
| Low physical activity → Poor self-rated health | DirectLiNGAM | Symptoms | 10 | 1.00 |
| BMI → Poor self-rated health | DirectLiNGAM | Symptoms | 10 | 1.00 |
| Male sex → Heavy drinking | DirectLiNGAM | Symptoms | 10 | 1.00 |
| Current smoking → Heavy drinking | DirectLiNGAM | Symptoms | 10 | 1.00 |
| Age → Heavy drinking | DirectLiNGAM | Symptoms | 10 | 1.00 |
| Age → Low physical activity | DirectLiNGAM | Symptoms | 10 | 1.00 |
| BMI → Low physical activity | DirectLiNGAM | Symptoms | 6 | 1.00 |
| Lack of social support → HI sum 22 | DirectLiNGAM | Symptoms | 10 | 1.00 |
| Current smoking → HI sum 22 | DirectLiNGAM | Symptoms | 10 | 1.00 |
| No health checkup → HI sum 22 | DirectLiNGAM | Symptoms | 10 | 1.00 |
| Age → HI sum 22 | DirectLiNGAM | Symptoms | 10 | 1.00 |
| BMI → HI sum 22 | DirectLiNGAM | Symptoms | 10 | 1.00 |
| Lack of social support → GI discomfort 23 | DirectLiNGAM | Symptoms | 9 | 1.00 |
| Age → GI discomfort 23 | DirectLiNGAM | Symptoms | 10 | 1.00 |
| BMI → GI discomfort 23 | DirectLiNGAM | Symptoms | 10 | 1.00 |
| Back pain 23 → GI discomfort 23 | DirectLiNGAM | Symptoms | 10 | 1.00 |
| Joint pain 23 → GI discomfort 23 | DirectLiNGAM | Symptoms | 9 | 1.00 |
| Sleep disturbance 23 → GI discomfort 23 | DirectLiNGAM | Symptoms | 10 | 1.00 |
| Fatigue 23 → GI discomfort 23 | DirectLiNGAM | Symptoms | 10 | 1.00 |
| Sleep disturbance 23 → Back pain 23 | DirectLiNGAM | Symptoms | 10 | 1.00 |
| Age → Joint pain 23 | DirectLiNGAM | Symptoms | 10 | 1.00 |
| BMI → Joint pain 23 | DirectLiNGAM | Symptoms | 10 | 1.00 |
| Back pain 23 → Joint pain 23 | DirectLiNGAM | Symptoms | 10 | 1.00 |
| Male sex → Headache 23 | DirectLiNGAM | Symptoms | 10 | 1.00 |
| Lack of social support → Headache 23 | DirectLiNGAM | Symptoms | 10 | 1.00 |
| Age → Headache 23 | DirectLiNGAM | Symptoms | 10 | 1.00 |
| Heavy drinking → Headache 23 | DirectLiNGAM | Symptoms | 8 | 1.00 |
| HI sum 22 → Headache 23 | DirectLiNGAM | Symptoms | 10 | 1.00 |
| GI discomfort 23 → Headache 23 | DirectLiNGAM | Symptoms | 10 | 1.00 |
| Back pain 23 → Headache 23 | DirectLiNGAM | Symptoms | 10 | 1.00 |
| Joint pain 23 → Headache 23 | DirectLiNGAM | Symptoms | 10 | 1.00 |
| Sleep disturbance 23 → Headache 23 | DirectLiNGAM | Symptoms | 10 | 1.00 |
| Fatigue 23 → Headache 23 | DirectLiNGAM | Symptoms | 10 | 1.00 |
| Age → Chest pain 23 | DirectLiNGAM | Symptoms | 10 | 1.00 |
| GI discomfort 23 → Chest pain 23 | DirectLiNGAM | Symptoms | 10 | 1.00 |
| Joint pain 23 → Chest pain 23 | DirectLiNGAM | Symptoms | 10 | 1.00 |
| Headache 23 → Chest pain 23 | DirectLiNGAM | Symptoms | 10 | 1.00 |
| Dyspnea 23 → Chest pain 23 | DirectLiNGAM | Symptoms | 10 | 1.00 |
| Dizziness 23 → Chest pain 23 | DirectLiNGAM | Symptoms | 10 | 1.00 |
| Memory disorder 23 → Chest pain 23 | DirectLiNGAM | Symptoms | 10 | 1.00 |
| Cough 23 → Chest pain 23 | DirectLiNGAM | Symptoms | 10 | 1.00 |
| Poor self-rated health → Dyspnea 23 | DirectLiNGAM | Symptoms | 6 | 1.00 |
| BMI → Dyspnea 23 | DirectLiNGAM | Symptoms | 7 | 1.00 |
| GI discomfort 23 → Dyspnea 23 | DirectLiNGAM | Symptoms | 10 | 1.00 |
| Back pain 23 → Dyspnea 23 | DirectLiNGAM | Symptoms | 10 | 1.00 |
| Joint pain 23 → Dyspnea 23 | DirectLiNGAM | Symptoms | 10 | 1.00 |
| Concentration decline 23 → Dyspnea 23 | DirectLiNGAM | Symptoms | 10 | 1.00 |
| Reduced libido 23 → Dyspnea 23 | DirectLiNGAM | Symptoms | 10 | 1.00 |
| Fatigue 23 → Dyspnea 23 | DirectLiNGAM | Symptoms | 10 | 1.00 |
| Age → Dizziness 23 | DirectLiNGAM | Symptoms | 8 | 1.00 |
| GI discomfort 23 → Dizziness 23 | DirectLiNGAM | Symptoms | 10 | 1.00 |
| Joint pain 23 → Dizziness 23 | DirectLiNGAM | Symptoms | 8 | 1.00 |
| Headache 23 → Dizziness 23 | DirectLiNGAM | Symptoms | 10 | 1.00 |
| Dyspnea 23 → Dizziness 23 | DirectLiNGAM | Symptoms | 7 | 1.00 |
| Sleep disturbance 23 → Dizziness 23 | DirectLiNGAM | Symptoms | 10 | 1.00 |
| Concentration decline 23 → Dizziness 23 | DirectLiNGAM | Symptoms | 10 | 1.00 |
| Fatigue 23 → Dizziness 23 | DirectLiNGAM | Symptoms | 10 | 1.00 |
| Lack of social support → Sleep disturbance 23 | DirectLiNGAM | Symptoms | 10 | 1.00 |
| Poor self-rated health → Sleep disturbance 23 | DirectLiNGAM | Symptoms | 10 | 1.00 |
| Age → Memory disorder 23 | DirectLiNGAM | Symptoms | 10 | 1.00 |
| Joint pain 23 → Memory disorder 23 | DirectLiNGAM | Symptoms | 10 | 1.00 |
| Dyspnea 23 → Memory disorder 23 | DirectLiNGAM | Symptoms | 10 | 1.00 |
| Dizziness 23 → Memory disorder 23 | DirectLiNGAM | Symptoms | 10 | 1.00 |
| Concentration decline 23 → Memory disorder 23 | DirectLiNGAM | Symptoms | 10 | 1.00 |
| Reduced libido 23 → Memory disorder 23 | DirectLiNGAM | Symptoms | 10 | 1.00 |
| Lack of social support → Concentration decline 23 | DirectLiNGAM | Symptoms | 10 | 1.00 |
| Age → Concentration decline 23 | DirectLiNGAM | Symptoms | 10 | 1.00 |
| HI sum 22 → Concentration decline 23 | DirectLiNGAM | Symptoms | 9 | 1.00 |
| GI discomfort 23 → Concentration decline 23 | DirectLiNGAM | Symptoms | 10 | 1.00 |
| Joint pain 23 → Concentration decline 23 | DirectLiNGAM | Symptoms | 10 | 1.00 |
| Headache 23 → Concentration decline 23 | DirectLiNGAM | Symptoms | 10 | 1.00 |
| Sleep disturbance 23 → Concentration decline 23 | DirectLiNGAM | Symptoms | 10 | 1.00 |
| Reduced libido 23 → Concentration decline 23 | DirectLiNGAM | Symptoms | 10 | 1.00 |
| Fatigue 23 → Concentration decline 23 | DirectLiNGAM | Symptoms | 10 | 1.00 |
| Male sex → Reduced libido 23 | DirectLiNGAM | Symptoms | 10 | 1.00 |
| Age → Reduced libido 23 | DirectLiNGAM | Symptoms | 10 | 1.00 |
| Heavy drinking → Reduced libido 23 | DirectLiNGAM | Symptoms | 10 | 1.00 |
| Joint pain 23 → Reduced libido 23 | DirectLiNGAM | Symptoms | 10 | 1.00 |
| Fatigue 23 → Reduced libido 23 | DirectLiNGAM | Symptoms | 10 | 1.00 |
| Male sex → Fatigue 23 | DirectLiNGAM | Symptoms | 8 | 1.00 |
| Lack of social support → Fatigue 23 | DirectLiNGAM | Symptoms | 10 | 1.00 |
| Poor self-rated health → Fatigue 23 | DirectLiNGAM | Symptoms | 10 | 1.00 |
| Back pain 23 → Fatigue 23 | DirectLiNGAM | Symptoms | 9 | 1.00 |
| Sleep disturbance 23 → Fatigue 23 | DirectLiNGAM | Symptoms | 10 | 1.00 |
| GI discomfort 23 → Cough 23 | DirectLiNGAM | Symptoms | 10 | 1.00 |
| Joint pain 23 → Cough 23 | DirectLiNGAM | Symptoms | 10 | 1.00 |
| Dyspnea 23 → Cough 23 | DirectLiNGAM | Symptoms | 10 | 1.00 |
| Dizziness 23 → Cough 23 | DirectLiNGAM | Symptoms | 7 | 1.00 |
| Concentration decline 23 → Cough 23 | DirectLiNGAM | Symptoms | 10 | 1.00 |
| Reduced libido 23 → Cough 23 | DirectLiNGAM | Symptoms | 10 | 1.00 |
| Fatigue 23 → Cough 23 | DirectLiNGAM | Symptoms | 10 | 1.00 |
| Age → Fever 23 | DirectLiNGAM | Symptoms | 10 | 1.00 |
| Poor self-rated health → Fever 23 | DirectLiNGAM | Symptoms | 10 | 1.00 |
| BMI → Fever 23 | DirectLiNGAM | Symptoms | 7 | 1.00 |
| HI sum 22 → Fever 23 | DirectLiNGAM | Symptoms | 10 | 1.00 |
| GI discomfort 23 → Fever 23 | DirectLiNGAM | Symptoms | 10 | 1.00 |
| Back pain 23 → Fever 23 | DirectLiNGAM | Symptoms | 10 | 1.00 |
| Joint pain 23 → Fever 23 | DirectLiNGAM | Symptoms | 10 | 1.00 |
| Headache 23 → Fever 23 | DirectLiNGAM | Symptoms | 10 | 1.00 |
| Chest pain 23 → Fever 23 | DirectLiNGAM | Symptoms | 10 | 1.00 |
| Dyspnea 23 → Fever 23 | DirectLiNGAM | Symptoms | 10 | 1.00 |
| Dizziness 23 → Fever 23 | DirectLiNGAM | Symptoms | 10 | 1.00 |
| Memory disorder 23 → Fever 23 | DirectLiNGAM | Symptoms | 10 | 1.00 |
| Concentration decline 23 → Fever 23 | DirectLiNGAM | Symptoms | 9 | 1.00 |
| Reduced libido 23 → Fever 23 | DirectLiNGAM | Symptoms | 10 | 1.00 |
| Cough 23 → Fever 23 | DirectLiNGAM | Symptoms | 10 | 1.00 |
| Fatigue 23 → Joint pain 23 | DirectLiNGAM | Symptoms | 7 | 1.00 |
| Memory disorder 23 → Cough 23 | DirectLiNGAM | Symptoms | 6 | 1.00 |
| Male sex → Current smoking | GOLEM | Symptoms | 7 | 1.00 |
| Living alone → Low income | GOLEM | Symptoms | 10 | 1.00 |
| Low education → Poor self-rated health | GOLEM | Symptoms | 8 | 1.00 |
| Current smoking → Heavy drinking | GOLEM | Symptoms | 9 | 1.00 |
| Low physical activity → Heavy drinking | GOLEM | Symptoms | 9 | 1.00 |
| Current smoking → Low physical activity | GOLEM | Symptoms | 8 | 1.00 |
| Joint pain 23 → GI discomfort 23 | GOLEM | Symptoms | 6 | 1.00 |
| Back pain 23 → Joint pain 23 | GOLEM | Symptoms | 8 | 1.00 |
| Headache 23 → Chest pain 23 | GOLEM | Symptoms | 7 | 1.00 |
| Cough 23 → Chest pain 23 | GOLEM | Symptoms | 10 | 1.00 |
| Poor self-rated health → Memory disorder 23 | GOLEM | Symptoms | 6 | 1.00 |
| Fatigue 23 → Concentration decline 23 | GOLEM | Symptoms | 10 | 1.00 |
| Sleep disturbance 23 → Fatigue 23 | GOLEM | Symptoms | 9 | 1.00 |
| Memory disorder 23 → Cough 23 | GOLEM | Symptoms | 10 | 1.00 |
| Back pain 23 → Fever 23 | GOLEM | Symptoms | 10 | 1.00 |
| Chest pain 23 → Fever 23 | GOLEM | Symptoms | 10 | 1.00 |
| Dizziness 23 → Fever 23 | GOLEM | Symptoms | 10 | 1.00 |
| Memory disorder 23 → Fever 23 | GOLEM | Symptoms | 9 | 1.00 |
| Cough 23 → Fever 23 | GOLEM | Symptoms | 10 | 1.00 |
| Low education → Low income | GOLEM | Symptoms | 8 | 1.00 |
| Poor self-rated health → Low income | GOLEM | Symptoms | 8 | 1.00 |
| GI discomfort 23 → Headache 23 | GOLEM | Symptoms | 7 | 1.00 |
| Sleep disturbance 23 → Headache 23 | GOLEM | Symptoms | 8 | 1.00 |
| Headache 23 → Dyspnea 23 | GOLEM | Symptoms | 8 | 1.00 |
| Fever 23 → Dyspnea 23 | GOLEM | Symptoms | 9 | 1.00 |
| GI discomfort 23 → Sleep disturbance 23 | GOLEM | Symptoms | 7 | 1.00 |
| Low income → Memory disorder 23 | GOLEM | Symptoms | 8 | 1.00 |
| Fatigue 23 → Reduced libido 23 | GOLEM | Symptoms | 9 | 1.00 |
| Headache 23 → Fatigue 23 | GOLEM | Symptoms | 8 | 1.00 |
| Low income → Cough 23 | GOLEM | Symptoms | 6 | 1.00 |
| Living alone → Low income | CORL | Symptoms | 7 | 1.00 |
| Joint pain 23 → Back pain 23 | CORL | Symptoms | 7 | 1.00 |
| Memory disorder 23 → Concentration decline 23 | CORL | Symptoms | 8 | 1.00 |
| Fatigue 23 → Concentration decline 23 | CORL | Symptoms | 10 | 1.00 |
| Age → Fever 23 | CORL | Symptoms | 9 | 1.00 |
| Chest pain 23 → Fever 23 | CORL | Symptoms | 8 | 1.00 |
| Cough 23 → Fever 23 | CORL | Symptoms | 10 | 1.00 |
| Age → Headache 23 | CORL | Symptoms | 8 | 1.00 |
| Low income → Lack of social support | DAGMA | Symptoms | 9 | 0.20 |
| Poor self-rated health → Lack of social support | DAGMA | Symptoms | 7 | 0.52 |
| Heavy drinking → Current smoking | DAGMA | Symptoms | 6 | 0.48 |
| Low education → No health checkup | DAGMA | Symptoms | 10 | 0.21 |
| Lack of social support → No health checkup | DAGMA | Symptoms | 6 | 0.19 |
| Low income → No health checkup | DAGMA | Symptoms | 9 | 0.47 |
| Poor self-rated health → No health checkup | DAGMA | Symptoms | 8 | 0.15 |
| Low physical activity → No health checkup | DAGMA | Symptoms | 6 | 0.18 |
| Low income → Living alone | DAGMA | Symptoms | 7 | 0.99 |
| Low education → Low physical activity | DAGMA | Symptoms | 8 | 0.14 |
| Poor self-rated health → Low physical activity | DAGMA | Symptoms | 7 | 0.35 |
| Heavy drinking → Low physical activity | DAGMA | Symptoms | 7 | 0.12 |
| Male sex → BMI | DAGMA | Symptoms | 6 | 0.91 |
| Low education → BMI | DAGMA | Symptoms | 8 | 0.30 |
| Lack of social support → BMI | DAGMA | Symptoms | 7 | 0.19 |
| Current smoking → BMI | DAGMA | Symptoms | 10 | 0.35 |
| Low income → BMI | DAGMA | Symptoms | 10 | 0.35 |
| Age → BMI | DAGMA | Symptoms | 10 | 2.03 |
| Poor self-rated health → BMI | DAGMA | Symptoms | 10 | 0.40 |
| Heavy drinking → BMI | DAGMA | Symptoms | 9 | 0.35 |
| Low physical activity → BMI | DAGMA | Symptoms | 10 | 0.42 |
| Low education → HI sum 22 | DAGMA | Symptoms | 9 | 0.25 |
| Lack of social support → HI sum 22 | DAGMA | Symptoms | 8 | 0.39 |
| Current smoking → HI sum 22 | DAGMA | Symptoms | 7 | 0.65 |
| No health checkup → HI sum 22 | DAGMA | Symptoms | 8 | 0.34 |
| Living alone → HI sum 22 | DAGMA | Symptoms | 10 | 0.45 |
| Heavy drinking → HI sum 22 | DAGMA | Symptoms | 9 | 0.28 |
| Low physical activity → HI sum 22 | DAGMA | Symptoms | 9 | 0.37 |
| Poor self-rated health → GI discomfort 23 | DAGMA | Symptoms | 9 | 0.20 |
| Back pain 23 → GI discomfort 23 | DAGMA | Symptoms | 7 | 0.36 |
| Joint pain 23 → GI discomfort 23 | DAGMA | Symptoms | 7 | 0.21 |
| Headache 23 → GI discomfort 23 | DAGMA | Symptoms | 7 | 0.26 |
| Chest pain 23 → GI discomfort 23 | DAGMA | Symptoms | 10 | 0.37 |
| Dizziness 23 → GI discomfort 23 | DAGMA | Symptoms | 9 | 0.31 |
| Sleep disturbance 23 → GI discomfort 23 | DAGMA | Symptoms | 6 | 0.25 |
| Concentration decline 23 → GI discomfort 23 | DAGMA | Symptoms | 8 | 0.18 |
| Fatigue 23 → GI discomfort 23 | DAGMA | Symptoms | 6 | 0.19 |
| Fever 23 → GI discomfort 23 | DAGMA | Symptoms | 10 | 0.31 |
| Poor self-rated health → Back pain 23 | DAGMA | Symptoms | 9 | 0.35 |
| Chest pain 23 → Back pain 23 | DAGMA | Symptoms | 8 | 0.31 |
| Dyspnea 23 → Back pain 23 | DAGMA | Symptoms | 7 | 0.36 |
| Sleep disturbance 23 → Back pain 23 | DAGMA | Symptoms | 6 | 0.34 |
| Fever 23 → Back pain 23 | DAGMA | Symptoms | 6 | 0.22 |
| Poor self-rated health → Joint pain 23 | DAGMA | Symptoms | 8 | 0.25 |
| Dyspnea 23 → Joint pain 23 | DAGMA | Symptoms | 8 | 0.38 |
| Dizziness 23 → Joint pain 23 | DAGMA | Symptoms | 8 | 0.34 |
| Heavy drinking → Headache 23 | DAGMA | Symptoms | 8 | 0.19 |
| Joint pain 23 → Headache 23 | DAGMA | Symptoms | 6 | 0.22 |
| Chest pain 23 → Headache 23 | DAGMA | Symptoms | 9 | 0.57 |
| Dizziness 23 → Headache 23 | DAGMA | Symptoms | 9 | 0.58 |
| Fever 23 → Headache 23 | DAGMA | Symptoms | 9 | 0.34 |
| Dizziness 23 → Chest pain 23 | DAGMA | Symptoms | 7 | 0.56 |
| Fever 23 → Chest pain 23 | DAGMA | Symptoms | 8 | 0.68 |
| Fever 23 → Dizziness 23 | DAGMA | Symptoms | 8 | 0.76 |
| Poor self-rated health → Sleep disturbance 23 | DAGMA | Symptoms | 7 | 0.38 |
| Headache 23 → Sleep disturbance 23 | DAGMA | Symptoms | 6 | 0.29 |
| Chest pain 23 → Sleep disturbance 23 | DAGMA | Symptoms | 10 | 0.24 |
| Dyspnea 23 → Sleep disturbance 23 | DAGMA | Symptoms | 8 | 0.20 |
| Dizziness 23 → Sleep disturbance 23 | DAGMA | Symptoms | 9 | 0.37 |
| Memory disorder 23 → Sleep disturbance 23 | DAGMA | Symptoms | 10 | 0.23 |
| Concentration decline 23 → Sleep disturbance 23 | DAGMA | Symptoms | 8 | 0.58 |
| Dizziness 23 → Memory disorder 23 | DAGMA | Symptoms | 7 | 0.29 |
| Fever 23 → Memory disorder 23 | DAGMA | Symptoms | 10 | 0.55 |
| Fever 23 → Concentration decline 23 | DAGMA | Symptoms | 6 | 0.50 |
| Heavy drinking → Reduced libido 23 | DAGMA | Symptoms | 7 | 0.19 |
| Dyspnea 23 → Reduced libido 23 | DAGMA | Symptoms | 8 | 0.17 |
| Memory disorder 23 → Reduced libido 23 | DAGMA | Symptoms | 9 | 0.29 |
| Fatigue 23 → Reduced libido 23 | DAGMA | Symptoms | 6 | 0.48 |
| Fever 23 → Reduced libido 23 | DAGMA | Symptoms | 10 | 0.51 |
| Poor self-rated health → Fatigue 23 | DAGMA | Symptoms | 8 | 0.32 |
| Headache 23 → Fatigue 23 | DAGMA | Symptoms | 6 | 0.21 |
| Dyspnea 23 → Fatigue 23 | DAGMA | Symptoms | 8 | 0.30 |
| Dizziness 23 → Fatigue 23 | DAGMA | Symptoms | 9 | 0.27 |
| Fever 23 → Fatigue 23 | DAGMA | Symptoms | 10 | 0.35 |
| Chest pain 23 → Cough 23 | DAGMA | Symptoms | 6 | 0.20 |
| Fever 23 → Cough 23 | DAGMA | Symptoms | 6 | 0.81 |
| Low education → Current smoking | DAGMA | Symptoms | 7 | 0.12 |
| Low income → Low physical activity | DAGMA | Symptoms | 9 | 0.23 |
| Poor self-rated health → HI sum 22 | DAGMA | Symptoms | 7 | 0.19 |
| Memory disorder 23 → Back pain 23 | DAGMA | Symptoms | 8 | 0.24 |
| Cough 23 → Back pain 23 | DAGMA | Symptoms | 7 | 0.20 |
| Chest pain 23 → Joint pain 23 | DAGMA | Symptoms | 9 | 0.51 |
| Memory disorder 23 → Joint pain 23 | DAGMA | Symptoms | 9 | 0.26 |
| Concentration decline 23 → Headache 23 | DAGMA | Symptoms | 6 | 0.20 |
| Chest pain 23 → Dyspnea 23 | DAGMA | Symptoms | 6 | 0.72 |
| Dizziness 23 → Dyspnea 23 | DAGMA | Symptoms | 6 | 0.52 |
| Fever 23 → Dyspnea 23 | DAGMA | Symptoms | 6 | 0.33 |
| Fever 23 → Sleep disturbance 23 | DAGMA | Symptoms | 6 | 0.17 |
| Chest pain 23 → Memory disorder 23 | DAGMA | Symptoms | 7 | 0.26 |
| Cough 23 → Reduced libido 23 | DAGMA | Symptoms | 7 | 0.22 |
| Concentration decline 23 → Fatigue 23 | DAGMA | Symptoms | 6 | 0.84 |
| Cough 23 → Fatigue 23 | DAGMA | Symptoms | 8 | 0.29 |
| Sleep disturbance 23 → Fatigue 23 | DAGMA | Symptoms | 6 | 0.42 |

BMI, body mass index; CI, confidence interval; CKD, chronic kidney disease; COPD, chronic obstructive pulmonary disease; GI, gastrointestinal; HI, health index; MI, myocardial infarction. ᵃTotal of 554 causal paths identified across 4 discovery methods (DirectLiNGAM, PC, NOTEARS, DAGMA, GOLEM, CORL) and 2 variable subsets (disease, symptoms). Average coefficients represent the strength of causal relationships, with values of 1.00 indicating paths consistently identified across all cross-validation folds.
