# Supplementary material for: Health Indifference and the Inverse Association Between Symptom Burden and Healthcare Use: A Longitudinal Cohort Study from the Japan Society and New Tobacco/Infodemic Survey
Source: Research Square preprint supplement (doi:10.21203/rs.3.rs-7584212/v1), 2025-10-22
Supplement: Supplementary file 2 [file 737abc57e5200fd8e0d073eb.docx]

Additional file 2. Detailed Methods

Health Indifference and the Inverse Association Between Symptom Burden and Healthcare Use: A Longitudinal Cohort Study from the Japan Society and New Tobacco/Infodemic Survey

Hikaru Oba¹*, Tomohiro Mitoma², Takahiro Tabuchi³, and Jota Maki¹

¹Medical Development Field, Center for Innovative Clinical Medicine, Okayama University Hospital, Okayama, Okayama, Japan

²Department of Obstetrics and Gynecology, Chugoku Central Hospital, Fukuyama, Hiroshima, Japan

³Division of Epidemiology, School of Public Health, Graduate School of Medicine, Tohoku University, Sendai, Miyagi, Japan

*Corresponding author:

Hikaru Oba, MD., PhD.

Medical Development Field,

Center for Innovative Clinical Medicine,

Okayama University Hospital

2-5-1, Shikata-cho, Kita-Ku, Okayama, Okayama, Japan

Email: [po957sax@okayama-u.ac.jp](mailto:po957sax@okayama-u.ac.jp)

Sample Size Calculation [1]

We calculated that 13,476 participants would provide 80% power to detect a relative risk of 0.80 for the primary outcome with a two-sided alpha of 0.05, assuming a 5% baseline hospitalization rate based on Japanese national health statistics.

Missing Data Handling [2]

Missing covariate data were addressed using multiple imputation by chained equations (MICE) with the following specifications:

Number of imputations: 5

Burn-in iterations: 10

Maximum iterations: 25

Imputation models: Predictive mean matching for continuous variables, logistic regression for binary variables, ordered logistic regression for ordinal variables

Sample posterior: True (enabling proper uncertainty propagation)

Convergence assessed via trace plots and Gelman-Rubin statistic (<1.1 for all variables)

Inverse Probability of Censoring Weights (IPCW)

To address potential attrition bias, we computed stabilized IPCW using:

Where:

= censoring indicator (1 if lost to follow-up, 0 if completed)

= baseline covariates

Weights were trimmed at the 1st and 99th percentiles to prevent extreme weights

Modified Poisson Regression

We used modified Poisson regression with robust standard errors to estimate relative risks for binary outcomes:

Where sandwich estimators (HC0) were used for variance estimation to account for model misspecification.

Dose-Response Analysis [3]

Restricted cubic splines with three degrees of freedom were fitted to examine non-linear relationships:

Degrees of freedom: 3

Range: 13-52 (full range of HI scores)

Reference value: median HI score (29)

Test for non-linearity: Wald test comparing spline model to linear model

Multiple Testing Correction [4]

Benjamini-Hochberg procedure: False discovery rate controlled at 0.05

Bonferroni correction: Family-wise error rate = 0.05/32 = 0.00156 for 32 outcomes

E-value Calculation [5]

For the confidence interval: calculated using the CI limit closer to the null

Complete Case Analysis [6]

Restricted to participants with no missing covariate data (n=10,876, 70.1%)

Alternative Categorizations

Quartile analysis: HI score divided into four equal groups

Causal Discovery Algorithms [7-10]

We employed four complementary causal discovery algorithms with temporal constraints to prevent implausible relationships (e.g., 2023 outcomes cannot cause 2021 baseline characteristics).

Direct Linear Non-Gaussian Acyclic Model (DirectLiNGAM)

DirectLiNGAM identifies causal direction in linear acyclic models by leveraging non-Gaussianity of data distributions. The algorithm assumes that for , if X and error term e are independent and at least one has non-Gaussian distribution, the causal direction can be identified through asymmetry in residual independence.

Implementation: gCastle library v1.0.4rc1

Pruning threshold: 0.05

Prior knowledge matrix: Temporal constraints encoded

Gradient-based Optimization of DAG-penalized Likelihood (GOLEM)

GOLEM reformulates DAG learning as a continuous optimization problem with score function:

Where:

l(W;X) = negative log-likelihood

= sparsity penalty (0.0001)

= acyclicity penalty (1.0)

Learning rate: 1e-4

Iterations: 10,000

Graph threshold: 0.001

DAGs via M-matrices for Acyclicity (DAGMA)

DAGMA uses log-determinant characterization of acyclicity:

Implementation: dagma library v1.0.0

Neural network architecture: [n_variables, 32, 1]

= = 0.001

Learning rate: 0.0003

Warm-up iterations: 1,000

Training iterations: 8,000

Weight threshold: 0.1

Causal discovery with Reinforcement Learning (CORL)

CORL frames graph generation as sequential decision-making where an agent learns to add edges maximizing a reward signal (score function reflecting data fit).

Implementation: gCastle library

Encoder: Transformer-based (4 heads, 4 blocks)

Batch size: 32

Actor/Critic learning rate: 1e-4

Iterations: 500

Reward score type: BIC

Edge threshold: 0.00001

Data type: float64

Cross-Validation for Causal Discovery

Method: 10-fold stratified cross-validation

Retention criterion: Edges detected in ≥6 folds (60% consistency)

Separate analyses for disease/infection and symptom outcomes

References:

1. Kelsey JL, Whittemore AS, Evans AS, Thompson WD. Methods in Observational Epidemiology. 2nd ed. New York: Oxford University Press; 1996.
2. Hernán MA, Brumback B, Robins JM. Marginal structural models to estimate the causal effect of zidovudine on the survival of HIV-positive men. Epidemiology. 2000;11(5):561-570.
3. Snowden JM, Rose S, Mortimer KM. Implementation of g-computation on a simulated data set: demonstration of a causal inference technique. Am J Epidemiol. 2011;173(7):731-738.
4. Benjamini Y, Hochberg Y. Controlling the false discovery rate: a practical and powerful approach to multiple testing. J R Stat Soc Series B. 1995;57(1):289-300.
5. VanderWeele TJ, Ding P. Sensitivity analysis in observational research: introducing the E-value. Ann Intern Med. 2017;167(4):268-274.
6. Little RJA, Rubin DB. Statistical Analysis with Missing Data. 3rd ed. John Wiley & Sons; 2019.
7. Shimizu S, Inazumi T, Sogawa Y, et al. DirectLiNGAM: A direct method for learning a linear non-Gaussian structural equation model. J Mach Learn Res. 2011;12:1225-1248.
8. Ng I, Ghassami A, Zhang K. On the role of sparsity and DAG constraints for learning linear DAGs. Adv Neural Inf Process Syst. 2020;33:17943-17954.
9. Bello K, Aragam B, Ravikumar P. DAGMA: Learning DAGs via M-matrices and a log-determinant acyclicity characterization. Adv Neural Inf Process Syst. 2022;35:24770-24782.
10. Wang X, Du Y, Zhu S, et al. Ordering-based causal discovery with reinforcement learning. Proceedings of the Thirtieth International Joint Conference on Artificial Intelligence. 2021:3566-3573.
