# Supplementary material for: Health Indifference and the Inverse Association Between Symptom Burden and Healthcare Use: A Longitudinal Cohort Study from the Japan Society and New Tobacco/Infodemic Survey
Source: Research Square preprint supplement (doi:10.21203/rs.3.rs-7584212/v1), 2025-10-22
Supplement: Supplementary file 4 [file ea495505263f33d233a18587.docx]

Additional file 1. Questions and responses in the questionnaires for each year

Health Indifference and the Inverse Association Between Symptom Burden and Healthcare Use: A Longitudinal Cohort Study from the Japan Society and New Tobacco/Infodemic Survey

Hikaru Oba¹*, Tomohiro Mitoma², Takahiro Tabuchi³, and Jota Maki¹

¹Medical Development Field, Center for Innovative Clinical Medicine, Okayama University Hospital, Okayama, Okayama, Japan

²Department of Obstetrics and Gynecology, Chugoku Central Hospital, Fukuyama, Hiroshima, Japan

³Division of Epidemiology, School of Public Health, Graduate School of Medicine, Tohoku University, Sendai, Miyagi, Japan

*Corresponding author:

Hikaru Oba, MD., PhD.

Medical Development Field,

Center for Innovative Clinical Medicine,

Okayama University Hospital

2-5-1, Shikata-cho, Kita-Ku, Okayama, Okayama, Japan

Email: [po957sax@okayama-u.ac.jp](mailto:po957sax@okayama-u.ac.jp)

2021 Survey (Baseline Covariates)

Demographics

- Sex: [Retrieved from panel attributes, not directly asked in questionnaire]
- Age: [Retrieved from panel attributes, not directly asked in questionnaire]

Socioeconomic Factors

- Education: Please indicate the school you last graduated from (or withdrew from), or are currently attending.
  - Options: Junior high school / Private high school / National/public high school / Vocational school / Junior college/technical college / Private university / National university / Public university (prefectural or municipal) / Graduate school / Other
- Household Income: Approximately how much was your household's annual income (before tax) last year? *Household income refers to the total income earned by your entire household in 2020, including earned income and other income (parental support, property income such as rent, child allowances, etc.)
  - Options: No household income / Less than 500,000 yen / 500,000-less than 1 million yen / 1-2 million yen / 2-3 million yen / 3-4 million yen / 4-5 million yen / 5-6 million yen / 6-7 million yen / 7-8 million yen / 8-9 million yen / 9-10 million yen / 10-12 million yen / 12-14 million yen / 14-16 million yen / 16-18 million yen / 18-20 million yen / 20 million yen or more / Prefer not to answer / Don't know
- Household Size: How many people, including yourself, usually live together and share living expenses (household members)? *Include those who are away for long periods such as job transfers if they return home at least once every 3 months.

Social Factors

- Social Support: In the past 30 days, how often did you feel that you had no companionship?
  - Options: Always / Most of the time / Sometimes / A little / Not at all

Health Behaviors

- Smoking Status: Do you currently smoke tobacco? (Please answer about the past 30 days)
  - Options: Smoke almost every day / Smoke occasionally / Used to smoke but quit / Never smoked
- Alcohol Frequency: How often do you drink alcoholic beverages?
  - Options: Don't drink / Once a month or less / 2-4 times a month / 2-3 times a week / 4 or more times a week
- Alcohol Amount: How much do you usually drink when you drink alcohol?
  - Options: 1-2 drinks (10-20g) / 3-4 drinks (30-40g) / About 6 drinks (50-60g) / About 9 drinks (70-90g) / 10 or more drinks (100g or more)
- Walking Time: In the past month, on average, how much time per day did you spend walking?
  - Options: None (0 hours) / Less than 30 minutes per day / About 30 minutes per day / 1 hour per day / 2 hours per day / 3 hours per day / 4-5 hours per day / 6-7 hours per day / 8-9 hours per day / 10-11 hours per day / 12 or more hours per day / Don't know
- Vigorous Exercise Time: In the past month, on average, how much time per day did you spend doing vigorous sports?
  - Options: [Same as walking time options]
- Health Checkup: Have you received a medical checkup (health examination, health screening, or comprehensive health checkup) in the past year? *Cancer-only screening, maternity checkups, dental examinations, and diagnostic tests at hospitals or clinics are not included.
  - Options: Yes / No

Health Status

- Self-Rated Health: How is your current health status? Please choose one answer.
  - Options: Good / Fairly good / Fair / Not very good / Poor
- Height and Weight: Please provide your current height and weight.
  - Height: ___ cm (Range: 50-220 cm)
  - Weight: ___ kg (Range: 10-300 kg)

2022 Survey (Exposure Variable: Health Indifference Scale)

Health Indifference Scale

What do you think about the following items? Please indicate your perception.

1. I am highly health-conscious
2. My health is important to me
3. I know what I should do to maintain my health
4. I take good care of my body to avoid illness or injury
5. If I get sick or injured, I make efforts to get better
6. I regularly have health checkups, examinations, or regular medical visits
7. I usually try to maintain healthy lifestyle habits
8. I change my lifestyle habits for my health
9. Work and income are more important to me than health
10. If I get sick, I can just leave it to the doctor
11. In my current life, I don't have time for health management
12. There is little need for regular visits for health management such as health checkups
13. I am interested in improving my health or maintaining my health

Options: Agree / Somewhat agree / Somewhat disagree / Disagree

2023 Survey (Outcome Variables)

Healthcare Utilization

- Hospitalization: Have you been hospitalized in the past year?
  - Options: Yes / No

COVID-19 Related

- COVID-19 Events: Have you experienced any of the following events?
  1. I was diagnosed with COVID-19 infection
  2. I was infected with COVID-19 and received oxygen therapy
  3. I was infected with COVID-19 and was hospitalized
  4. I was infected with COVID-19 and received ventilator treatment
  5. A family member living with me was diagnosed with COVID-19
  6. A family member living with me was infected with COVID-19 and received oxygen therapy
  7. A family member living with me was infected with COVID-19 and was hospitalized
  8. A family member or relative not living with me was diagnosed with COVID-19
  9. A family member or relative died from COVID-19
  10. A colleague or supervisor was diagnosed with COVID-19
  11. Options: Occurred in the past 2 months / Occurred between 6 months and 2 months ago / Occurred between 1 year and 6 months ago / Occurred more than 1 year ago / Did not occur
- COVID-19 Vaccination: What is your COVID-19 vaccination status?
  1. Options: Received 5 doses / Received 4 doses / Received 3 doses / Received 2 doses / Received 1 dose / Cannot receive due to chronic conditions/allergies (0 doses) / Want to wait and see before getting vaccinated (0 doses) / Don't feel the need to get vaccinated (0 doses) / Don't want to get vaccinated (0 doses)
- Influenza Vaccination: Have you received an influenza vaccine since October 2022?
  1. Options: Yes / No

Chronic Diseases

Do you currently have any chronic conditions?

1. Hypertension
2. Diabetes
3. Dyslipidemia (hyperlipidemia)
4. Asthma
5. Periodontal disease
6. Dental caries
7. Angina/myocardial infarction
8. Stroke (cerebral infarction or cerebral hemorrhage)
9. COPD (chronic obstructive pulmonary disease)
10. Chronic kidney disease
11. Chronic hepatitis/cirrhosis
12. Cancer/malignant tumor
13. Chronic pain (lasting 3 months or more) such as back pain or headache
14. Depression

Options: Never had / Had in the past but not currently / Currently have (under treatment with medication) / Currently have (under treatment without medication) / Currently have (not under treatment)

Symptoms

In the past week, how much have you been bothered by the following physical problems?

1. Gastrointestinal discomfort
2. Back or lower back pain
3. Pain in arms, legs, or joints
4. Headache
5. Chest pain
6. Shortness of breath
7. Dizziness
8. Sleep problems
9. Memory problems
10. Difficulty concentrating
11. Reduced libido
12. Fatigue
13. Cough
14. Fever or low-grade fever

Options: Not bothered at all / Slightly bothered / Somewhat bothered / Considerably bothered / Very bothered
